# Supplementary material for: Structural and dynamic basis of acid amido synthetase GH3.1: an investigation of substrate selectivity and major active site access channels
Source: Royal Society of Chemistry journal article supplement (doi:10.1039/c4mb00608a), 2014-12-15
Supplement: c4mb00608a1.pdf [file c4mb00608a1.pdf]

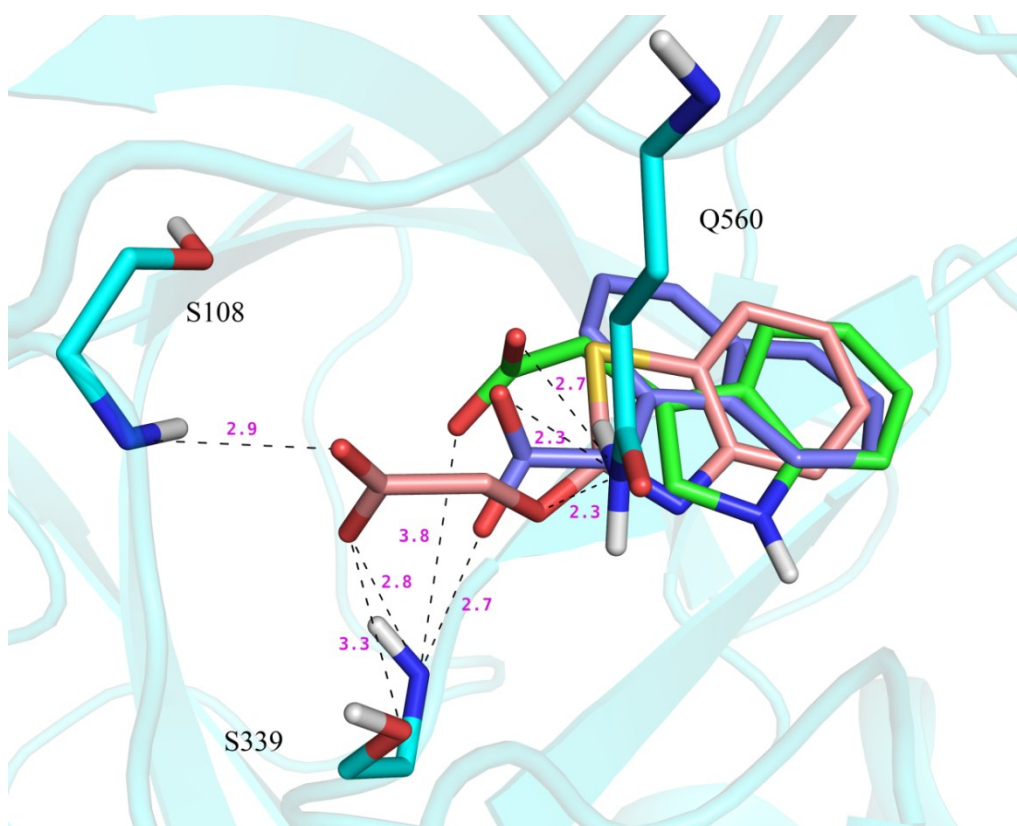

Fig.S1. Binding modes of the three substrates to the open form of VvGH3.1 predicted by molecular docking. The carbon atoms of substrates are colored in green (IAA), slate (NAA), salmon (BTOA).

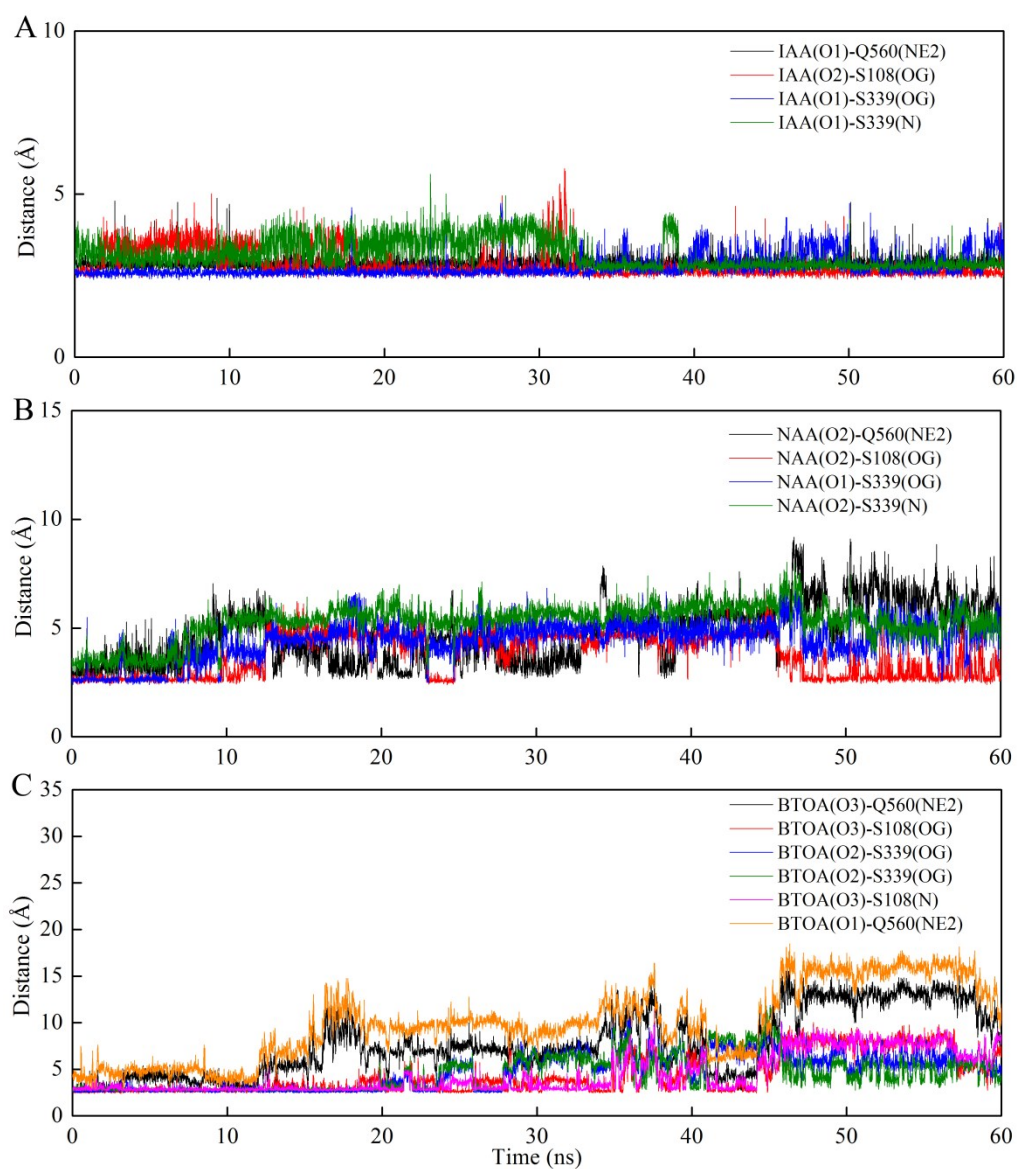

Fig. S2. Monitoring for the intermolecular hydrogen bonds between GH3.1 and substrates during the MD simulation, (A) GH3.1-ATP-IAA system; (B) GH3.1-ATP-NAA system; (C) GH3.1-ATP-BTOA system.
